# Supplementary material
Source: Elsevier journal article supplement (https://www.sciencedirect.com/science/article/pii/S1134207222000020)
Supplement: mmc2 [file mmc2.pdf]

# Anexo II. Diario de sueño de consenso

Nombre y apellidos

Ejemplo

|                                                                                                               |                                                                                                                                                                                           |                                                                                                                                                                                |                                                                                                                                                                                |
|---------------------------------------------------------------------------------------------------------------|-------------------------------------------------------------------------------------------------------------------------------------------------------------------------------------------|--------------------------------------------------------------------------------------------------------------------------------------------------------------------------------|--------------------------------------------------------------------------------------------------------------------------------------------------------------------------------|
| Fecha                                                                                                         | 03/09/2021                                                                                                                                                                                |                                                                                                                                                                                |                                                                                                                                                                                |
| 1. ¿A qué hora se acostó?                                                                                     | 23:30                                                                                                                                                                                     |                                                                                                                                                                                |                                                                                                                                                                                |
| 2. ¿A qué hora intentó dormirse?                                                                              | 23:45                                                                                                                                                                                     |                                                                                                                                                                                |                                                                                                                                                                                |
| 3. ¿Cuánto le costó dormirse?                                                                                 | 55 minutos                                                                                                                                                                                |                                                                                                                                                                                |                                                                                                                                                                                |
| 4. ¿Cuántas veces se despertó sin contar el despertar final?                                                  | 6                                                                                                                                                                                         |                                                                                                                                                                                |                                                                                                                                                                                |
| 5. En total, ¿cuánto tiempo duraron esos despertares?                                                         | 2 horas y 5 minutos                                                                                                                                                                       |                                                                                                                                                                                |                                                                                                                                                                                |
| 6a. ¿A qué hora fue el último despertar?                                                                      | 06:35                                                                                                                                                                                     |                                                                                                                                                                                |                                                                                                                                                                                |
| 6b. Después del último despertar, ¿cuánto tiempo ha permanecido en la cama intentando dormirse?               | 40 minutos                                                                                                                                                                                |                                                                                                                                                                                |                                                                                                                                                                                |
| 6c. ¿Se ha despertado antes de la hora prevista?                                                              | <input checked="" type="checkbox"/> Sí <input type="checkbox"/> No                                                                                                                        | <input type="checkbox"/> Sí <input type="checkbox"/> No                                                                                                                        | <input type="checkbox"/> Sí <input type="checkbox"/> No                                                                                                                        |
| 6d. Si es así, ¿cuánto antes?                                                                                 |                                                                                                                                                                                           |                                                                                                                                                                                |                                                                                                                                                                                |
| 7. ¿A qué hora salió de la cama para empezar el día?                                                          | 07:20                                                                                                                                                                                     |                                                                                                                                                                                |                                                                                                                                                                                |
| 8. En total, ¿cuánto tiempo ha dormido?                                                                       | 4 horas y 10 minutos                                                                                                                                                                      |                                                                                                                                                                                |                                                                                                                                                                                |
| 9. ¿Cómo valora la calidad de su sueño?                                                                       | <input type="checkbox"/> Pésima<br><input checked="" type="checkbox"/> Mala<br><input type="checkbox"/> Aceptable<br><input type="checkbox"/> Buena<br><input type="checkbox"/> Excelente | <input type="checkbox"/> Pésima<br><input type="checkbox"/> Mala<br><input type="checkbox"/> Aceptable<br><input type="checkbox"/> Buena<br><input type="checkbox"/> Excelente | <input type="checkbox"/> Pésima<br><input type="checkbox"/> Mala<br><input type="checkbox"/> Aceptable<br><input type="checkbox"/> Buena<br><input type="checkbox"/> Excelente |
| 10. ¿Cómo de descansado o recuperado se sintió cuando se levantó para empezar el día?                         | <input type="checkbox"/> Nada<br><input type="checkbox"/> Muy poco<br><input checked="" type="checkbox"/> Algo<br><input type="checkbox"/> Bastante<br><input type="checkbox"/> Mucho     | <input type="checkbox"/> Nada<br><input type="checkbox"/> Muy poco<br><input type="checkbox"/> Algo<br><input type="checkbox"/> Bastante<br><input type="checkbox"/> Mucho     | <input type="checkbox"/> Nada<br><input type="checkbox"/> Muy poco<br><input type="checkbox"/> Algo<br><input type="checkbox"/> Bastante<br><input type="checkbox"/> Mucho     |
| 11a. ¿Cuántas siestas o cabezadas realizó a lo largo del día de ayer?                                         | 3                                                                                                                                                                                         |                                                                                                                                                                                |                                                                                                                                                                                |
| 11b. En total, ¿cuánto tiempo de siestas o cabezadas realizó ayer?                                            | 1 hora y 40 minutos                                                                                                                                                                       |                                                                                                                                                                                |                                                                                                                                                                                |
| 12a. ¿Cuántas bebidas alcohólicas tomó a lo largo del día de ayer?                                            | 2 bebidas                                                                                                                                                                                 |                                                                                                                                                                                |                                                                                                                                                                                |
| 12b. ¿A qué hora tomó la última bebida alcohólica?                                                            | 21:20                                                                                                                                                                                     |                                                                                                                                                                                |                                                                                                                                                                                |
| 13a. ¿Cuántas bebidas con cafeína (café, té, refrescos, bebidas energéticas) tomó a lo largo del día de ayer? | 3 bebidas                                                                                                                                                                                 |                                                                                                                                                                                |                                                                                                                                                                                |
| 13b. ¿A qué hora tomó la última bebida con cafeína?                                                           | 15:00                                                                                                                                                                                     |                                                                                                                                                                                |                                                                                                                                                                                |
| 14. Tomó medicamentos con o sin receta médica para ayudarlo durante el día de ayer?                           | <input checked="" type="checkbox"/> Sí <input type="checkbox"/> No<br>Medicación: Dormidina<br>Dosis: 25 mg<br>Hora: 23:00                                                                | <input type="checkbox"/> Sí <input type="checkbox"/> No<br>Medicación:<br>Dosis:<br>Hora:                                                                                      | <input type="checkbox"/> Sí <input type="checkbox"/> No<br>Medicación:<br>Dosis:<br>Hora:                                                                                      |
| 15. Comentarios                                                                                               | Estaba resfriado                                                                                                                                                                          |                                                                                                                                                                                |                                                                                                                                                                                |

|                                                                                                                                                                                |                                                                                                                                                                                |                                                                                                                                                                                |                                                                                                                                                                                |                                                                                                                                                                                |
|--------------------------------------------------------------------------------------------------------------------------------------------------------------------------------|--------------------------------------------------------------------------------------------------------------------------------------------------------------------------------|--------------------------------------------------------------------------------------------------------------------------------------------------------------------------------|--------------------------------------------------------------------------------------------------------------------------------------------------------------------------------|--------------------------------------------------------------------------------------------------------------------------------------------------------------------------------|
|                                                                                                                                                                                |                                                                                                                                                                                |                                                                                                                                                                                |                                                                                                                                                                                |                                                                                                                                                                                |
|                                                                                                                                                                                |                                                                                                                                                                                |                                                                                                                                                                                |                                                                                                                                                                                |                                                                                                                                                                                |
|                                                                                                                                                                                |                                                                                                                                                                                |                                                                                                                                                                                |                                                                                                                                                                                |                                                                                                                                                                                |
|                                                                                                                                                                                |                                                                                                                                                                                |                                                                                                                                                                                |                                                                                                                                                                                |                                                                                                                                                                                |
|                                                                                                                                                                                |                                                                                                                                                                                |                                                                                                                                                                                |                                                                                                                                                                                |                                                                                                                                                                                |
|                                                                                                                                                                                |                                                                                                                                                                                |                                                                                                                                                                                |                                                                                                                                                                                |                                                                                                                                                                                |
|                                                                                                                                                                                |                                                                                                                                                                                |                                                                                                                                                                                |                                                                                                                                                                                |                                                                                                                                                                                |
|                                                                                                                                                                                |                                                                                                                                                                                |                                                                                                                                                                                |                                                                                                                                                                                |                                                                                                                                                                                |
| <input type="checkbox"/> Sí <input type="checkbox"/> No                                                                                                                        |
|                                                                                                                                                                                |                                                                                                                                                                                |                                                                                                                                                                                |                                                                                                                                                                                |                                                                                                                                                                                |
|                                                                                                                                                                                |                                                                                                                                                                                |                                                                                                                                                                                |                                                                                                                                                                                |                                                                                                                                                                                |
|                                                                                                                                                                                |                                                                                                                                                                                |                                                                                                                                                                                |                                                                                                                                                                                |                                                                                                                                                                                |
| <input type="checkbox"/> Pésima<br><input type="checkbox"/> Mala<br><input type="checkbox"/> Aceptable<br><input type="checkbox"/> Buena<br><input type="checkbox"/> Excelente | <input type="checkbox"/> Pésima<br><input type="checkbox"/> Mala<br><input type="checkbox"/> Aceptable<br><input type="checkbox"/> Buena<br><input type="checkbox"/> Excelente | <input type="checkbox"/> Pésima<br><input type="checkbox"/> Mala<br><input type="checkbox"/> Aceptable<br><input type="checkbox"/> Buena<br><input type="checkbox"/> Excelente | <input type="checkbox"/> Pésima<br><input type="checkbox"/> Mala<br><input type="checkbox"/> Aceptable<br><input type="checkbox"/> Buena<br><input type="checkbox"/> Excelente | <input type="checkbox"/> Pésima<br><input type="checkbox"/> Mala<br><input type="checkbox"/> Aceptable<br><input type="checkbox"/> Buena<br><input type="checkbox"/> Excelente |
| <input type="checkbox"/> Nada<br><input type="checkbox"/> Muy poco<br><input type="checkbox"/> Algo<br><input type="checkbox"/> Bastante<br><input type="checkbox"/> Mucho     | <input type="checkbox"/> Nada<br><input type="checkbox"/> Muy poco<br><input type="checkbox"/> Algo<br><input type="checkbox"/> Bastante<br><input type="checkbox"/> Mucho     | <input type="checkbox"/> Nada<br><input type="checkbox"/> Muy poco<br><input type="checkbox"/> Algo<br><input type="checkbox"/> Bastante<br><input type="checkbox"/> Mucho     | <input type="checkbox"/> Nada<br><input type="checkbox"/> Muy poco<br><input type="checkbox"/> Algo<br><input type="checkbox"/> Bastante<br><input type="checkbox"/> Mucho     | <input type="checkbox"/> Nada<br><input type="checkbox"/> Muy poco<br><input type="checkbox"/> Algo<br><input type="checkbox"/> Bastante<br><input type="checkbox"/> Mucho     |
|                                                                                                                                                                                |                                                                                                                                                                                |                                                                                                                                                                                |                                                                                                                                                                                |                                                                                                                                                                                |
|                                                                                                                                                                                |                                                                                                                                                                                |                                                                                                                                                                                |                                                                                                                                                                                |                                                                                                                                                                                |
|                                                                                                                                                                                |                                                                                                                                                                                |                                                                                                                                                                                |                                                                                                                                                                                |                                                                                                                                                                                |
|                                                                                                                                                                                |                                                                                                                                                                                |                                                                                                                                                                                |                                                                                                                                                                                |                                                                                                                                                                                |
|                                                                                                                                                                                |                                                                                                                                                                                |                                                                                                                                                                                |                                                                                                                                                                                |                                                                                                                                                                                |
| <input type="checkbox"/> Sí <input type="checkbox"/> No<br>Medicación:                                                                                                         |
| Dosis:<br>Hora:                                                                                                                                                                | Dosis:<br>Hora:                                                                                                                                                                | Dosis:<br>Hora:                                                                                                                                                                | Dosis:<br>Hora:                                                                                                                                                                | Dosis:<br>Hora:                                                                                                                                                                |
|                                                                                                                                                                                |                                                                                                                                                                                |                                                                                                                                                                                |                                                                                                                                                                                |                                                                                                                                                                                |
